# Supplementary material
Source: HighWire-hosted journal article supplement (https://bjgp.org/highwire/filestream/41968/field_highwire_adjunct_files/0/BJGP.2020.1099_suppl.pdf)
Supplement: BJGP.2020.1099_suppl.pdf [file BJGP.2020.1099_suppl.pdf]

## Appendix S1

The study includes 113 of 114 patients who have been described in the previous publication: Estimating lung cancer risk from chest X-ray and symptoms: a prospective cohort study, British Journal of General Practice 2021; 71 (705): e280-e286. DOI: <https://doi.org/10.3399/bjgp20X713993>. The reason that the present study does not include all 114 patients is that one patient was diagnosed with cancer outside of the study period.

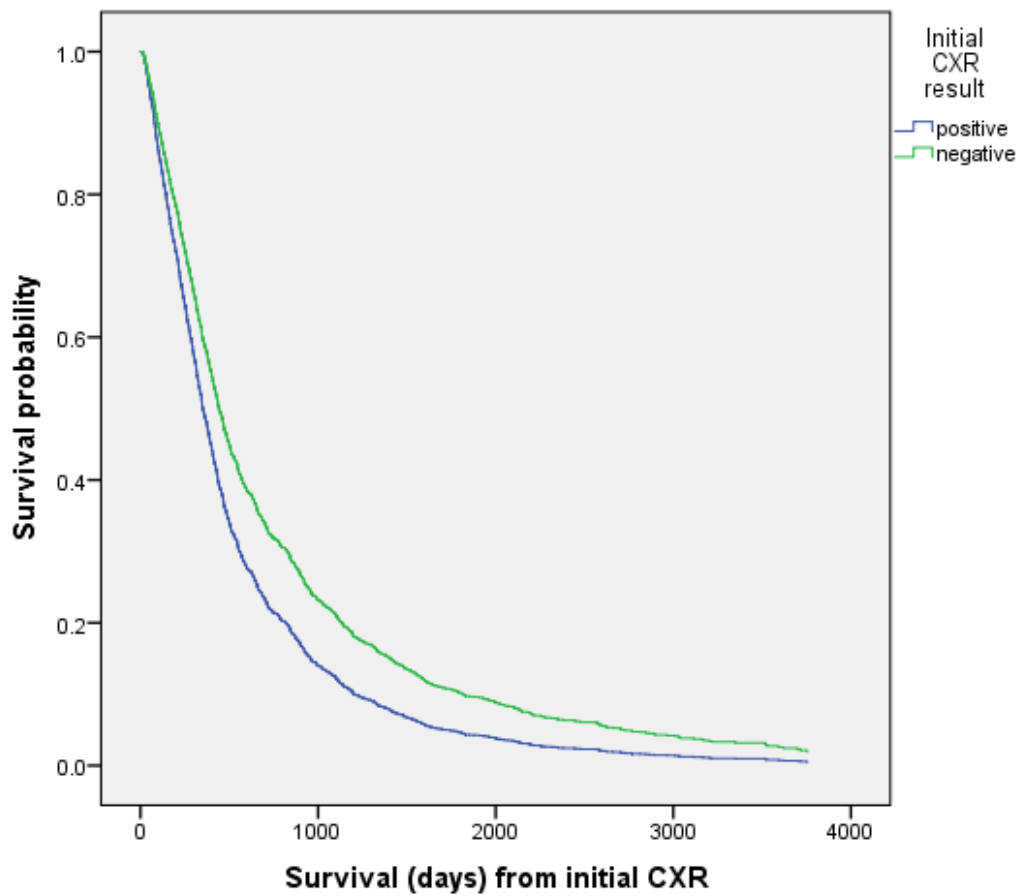

**Figure S1:** Cox regression survival analysis of chest x-ray result and duration of survival following initial chest x-ray adjusted for age, stage at diagnosis, deprivation, sex and performance status. The blue line indicates positive chest x-ray result, the green line indicates negative chest x-ray result

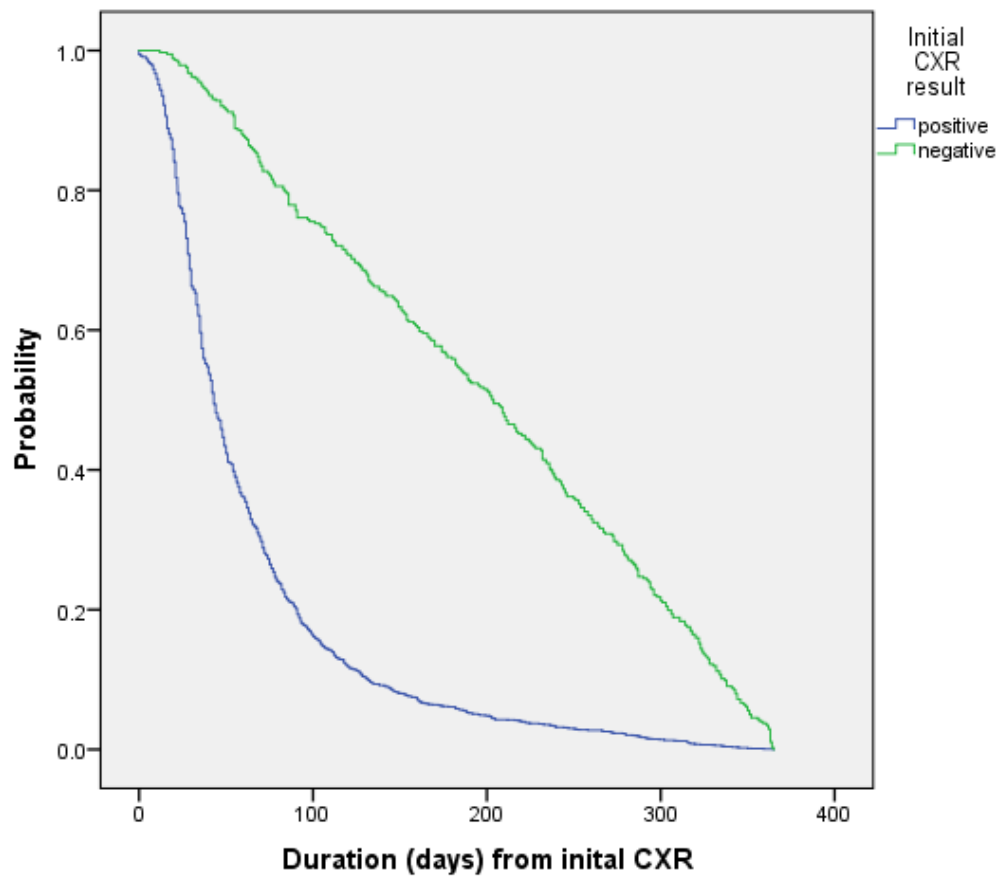

**Figure S2:** Kaplan Meier survival analysis for chest x-ray result with respect to duration to diagnosis from initial chest x-ray (days). Log rank test  $p < 0.000$

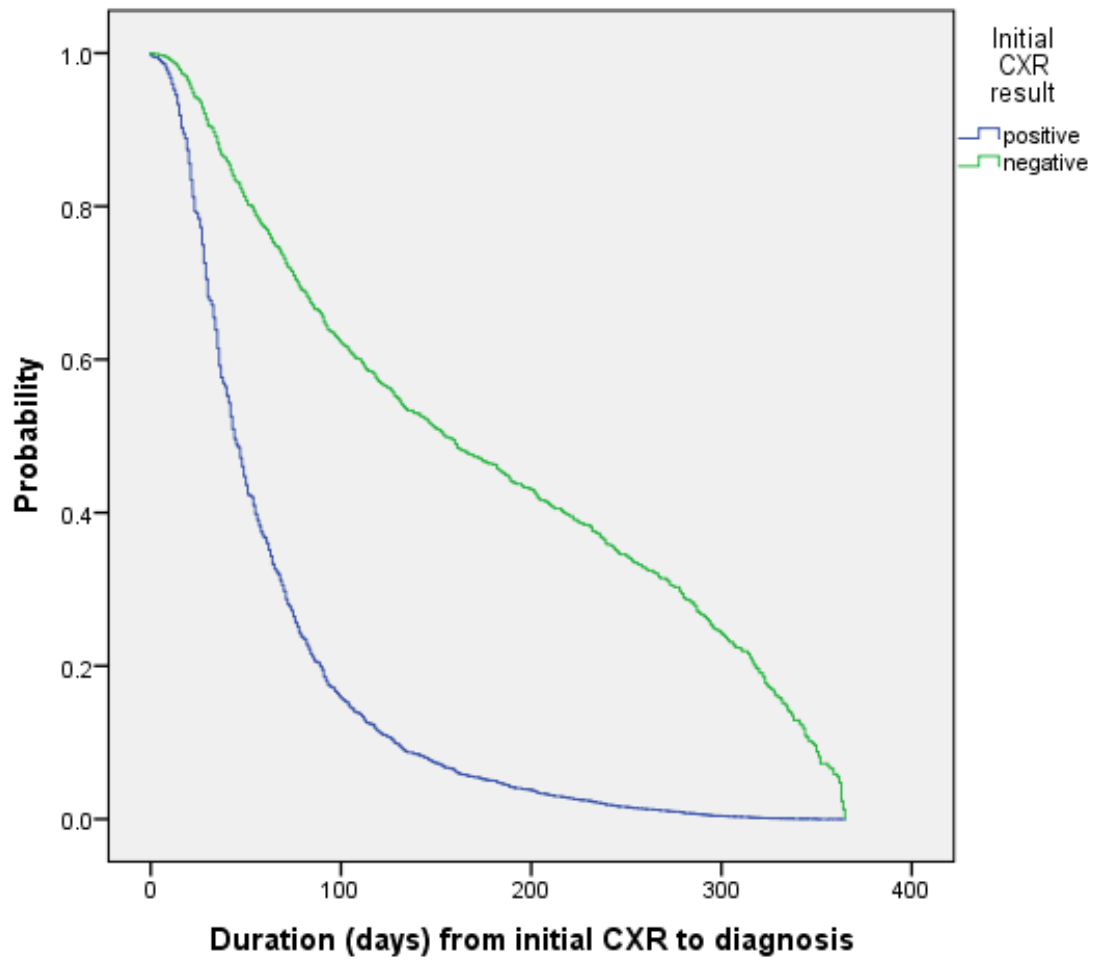

**Figure S3:** Cox regression survival analysis of chest x-ray result and duration to diagnosis in days from index chest x-ray with adjustment for stage, performance status, deprivation, sex and age. Hazard ratio 3.88 (95% confidence intervals 3.43 to 4.39,  $p < 0.000$ )

|                                      | <b>Diagnosed <i>within</i> six weeks of initial CXR (%)</b> | <b>Diagnosed <i>after</i> six weeks of initial CXR</b> |
|--------------------------------------|-------------------------------------------------------------|--------------------------------------------------------|
| <b>Non small-cell/Other/Unknown</b>  | 729 (82.4)                                                  | 1136 (91.2)                                            |
| <b>Small-cell</b>                    | 155 (17.5)                                                  | 109 (8.8)                                              |
| <b>Total (% of study population)</b> | 884 (41.5)                                                  | 1245 (58.5)                                            |

**Table S1:** Lung cancer histology with respect to diagnosis with lung cancer within, or after six weeks (42 days) following initial chest x-ray. Pearson's chi squared demonstrated a statistically significant association between small-cell histology and diagnosis within six weeks,  $\chi^2$  (1, N=2129) 36.68,  $P < 0.001$
